# Supplementary material for: Management of dabigatran-induced bleeding: expert statement
Source: Springer Nature journal article supplement (doi:10.1007/s00508-013-0430-3), 2013-11-01
Supplement: MOESM1 [file 14913428]

## 1. MANIFEST BLEEDING

### A) Mild Bleeding

no transfusion, stable haemodynamics

### B) Severe Bleeding

< 4 erythrocyte concentrates  
haemodynamically stable  
without catecholamines

### C) Life-threatening or organ-threatening Bleeding

≥ 4 erythrocyte concentrates,  
catecholamine demand

Clinical observation

Clinical observation, haemodynamic monitoring  
Volume therapy  
Erythrocyte concentrate transfusion  
according to individual transfusion trigger (~ 7-9 g/dl)

Local haemostasis

e.g. sclerotherapy, compression

General measures

e.g. avoidance of hypertension, hypothermia

Local haemostasis

e.g. surgical Intervention, compression

General measures

e.g. avoidance of hypothermia, acidosis, hypocalcaemia,  
correction of secondary acquired coagulopathy

Reduction of dabigatran

e.g. discontinuation, suspension until  
haemostasis is achieved

Discontinue dabigatran

Reduce resorption

active coal (1 g/kg BW) enterally in case of dabigatran intake < 2h

Consider forced elimination  
haemodialysis > 4 h (haemo(dia)filtration)

Consider reversal  
PPSB or FEIBA (≥ 25 U/kg BW) or rFVIIa  
(≥ 50 µg/kg BW); consider repetition  
(not effective: FFP)

Laboratory analyses

blood count

renal function (eGFR, creatinine clearance)

if available: routine coagulation tests,  
dabigatran-sensitive test

Laboratory analyses

blood count

renal function (eGFR, creatinine clearance)

routine coagulation tests including thrombin time;  
if available: Hemoclot Test or ecarin clotting time

## 2. PERIOPERATIVES BLEEDING RISK

### Elective Surgery

#### Minor bleeding risk

Continue dabigatran  
Clinical observation  
Vigilance of surgical team

#### High bleeding risk

Discontinue dabigatran:  
creatinine clearance > 80 ml/min:  
2 days  
creatinine clearance 50-80 ml/min:  
3 days  
creatinine clearance 30-50 ml/min:  
≥ 4 days  
Clinical observation  
Careful haemostasis  
Patient Blood Management  
General measures  
e.g. avoidance of hypothermia; volume therapy

#### Severe/life-threatening bleeding

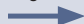

see reverse side

Laboratory analyses

pre-op: blood count, renal function  
intra-op: blood count

### Acute Surgery

#### Minor bleeding risk

Dabigatran not discontinued  
Clinical observation, haemodynamic monitoring  
Vigilance of surgical team

#### High bleeding risk

Discontinue dabigatran  
Reduce resorption  
active coal (1 g/kg BW) enterally in case of dabigatran intake < 2 h  
Consider forced elimination  
haemodialysis > 4 h (haemo(dia)filtration)  
Clinical observation  
Careful haemostasis  
Patient Blood Management  
General measures  
e.g. avoidance of hypothermia, volume therapy

#### Severe/life-threatening bleeding

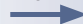

see reverse side

Laboratory analyses

blood count, renal function, routine coagulation tests including thrombin time  
if available: Hemoclot Test or ecarin clotting time

### Emergency Surgery

Consider reversal  
PPSB or FEIBA (≥ 25 U/kg BW) or rFVIIa  
(≥ 50 µg/kg BW); consider repetition  
(not effective: FFP)
